# Supplementary material
Source: ML conference proceedings conference paper supplement (https://proceedings.mlr.press/v70/hoffman17a.html)
Supplement: Supplementary file [file hoffman17a-supp.pdf]

---

Learning Deep Latent Gaussian Models with Markov Chain Monte Carlo:  
Additional Figures

---

Anonymous Authors<sup>1</sup>

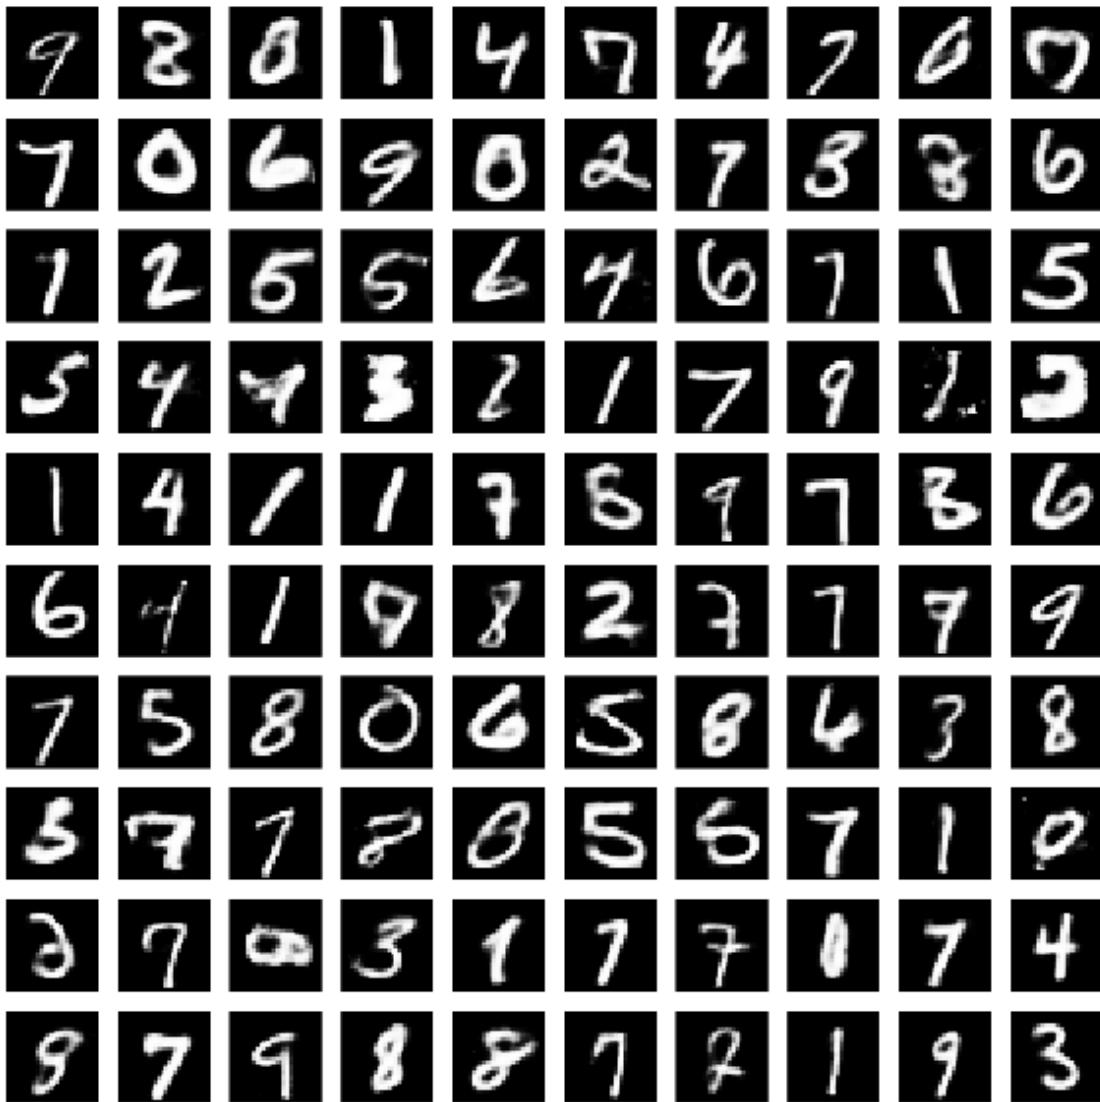

Figure 1. Samples from the VAE trained using mean-field variational inference.

110  
111  
112  
113  
114  
115  
116  
117  
118  
119  
120  
121  
122  
123  
124  
125  
126  
127  
128  
129  
130  
131  
132  
133  
134  
135  
136  
137  
138  
139  
140  
141  
142  
143  
144  
145  
146  
147  
148  
149  
150  
151  
152  
153  
154  
155  
156  
157  
158  
159  
160  
161  
162  
163  
164

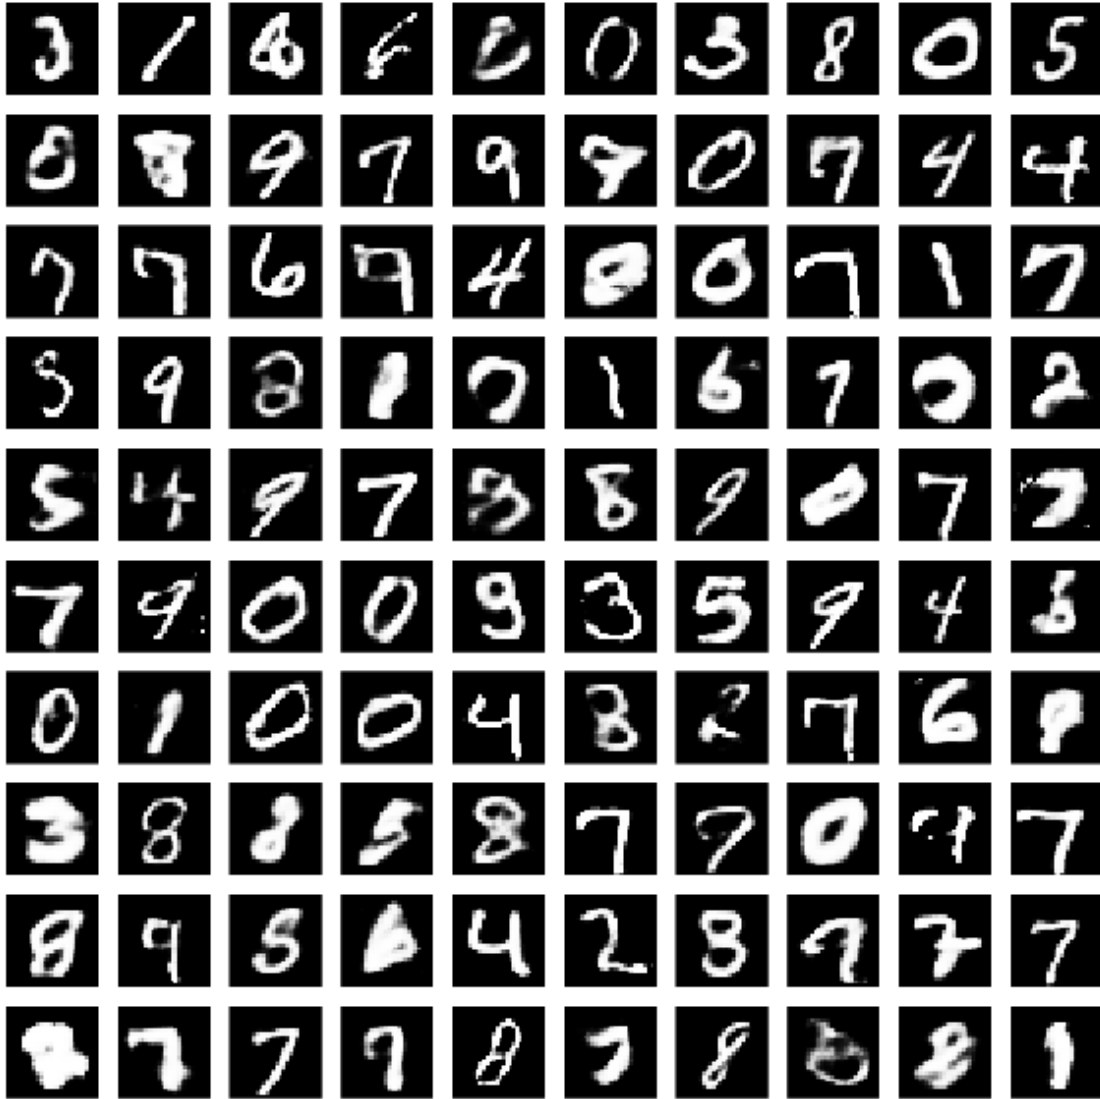

165  
166  
167  
168  
169  
170  
171  
172  
173  
174  
175  
176  
177  
178  
179  
180  
181  
182  
183  
184  
185  
186  
187  
188  
189  
190  
191  
192  
193  
194  
195  
196  
197  
198  
199  
200  
201  
202  
203  
204  
205  
206  
207  
208  
209  
210  
211  
212  
213  
214  
215  
216  
217  
218  
219

Figure 2. Samples from the DLGM trained with 20 steps of HMC.

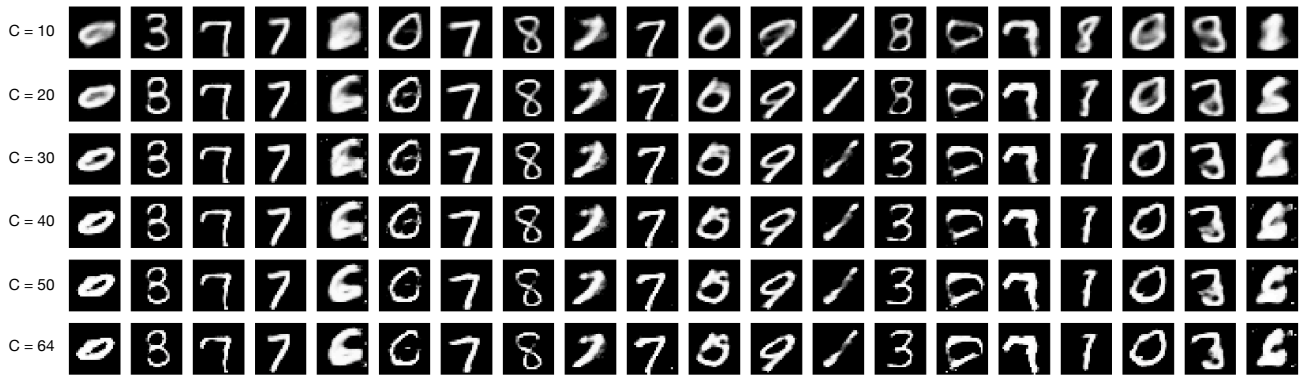

Figure 3. Effects of keeping only the first  $C$  most important dimensions of  $z$ , marginalizing out the remaining dimensions.  $z$  vectors are randomly sampled from  $\mathcal{N}(0, I)$ .
